# Supplementary material for: Silver, Gold, and Silver-Gold Bimetallic Nanoparticle-Decorated Dextran: Facile Synthesis and Versatile Tunability on the Antimicrobial Activity
Source: Hindawi journal article supplement (doi:10.1155/2020/7195048), 2020-10-20
Supplement: f1 [file 7195048.f1.pdf]

## Electronic Supplementary information (ESI)

The supplementary materials has two figures and four tables that includes: The **Figure S1** showed low magnification TEM images of Ag/dextran, sample S7, sample S5, sample S3 and Au/dextran to clearly observe the morphology and size of obtained nanocomposites; The **Figure S2** exhibited particle size distribution analysis of Ag/dextran, Au/dextran and Ag-Au bimetallic nanoparticles in dextran to clearly analyze the diameter of as-synthesized nanoparticles; The **Tables S1-S3** exhibited elemental composition of samples S7, S5 and S3 to clearly demonstrate the chemical composition of alloy nanoparticles; The **Table S4** showed the bands of hydroxyl and carbonyl stretching vibration of dextran, Ag/dextran, Au/dextran and Ag-Au bimetallic/dextran to confirm the light shifting of bands assigning to the hydroxyl and carbonyl functional groups indicating that the formation of silver, gold and silver-gold bimetallic nanoparticles.

**Fig. S1.** Low magnification TEM images of Ag/dex tran (a), sample S7 (b), sample S5 (c), sample S3 (d) and Au/dextran.

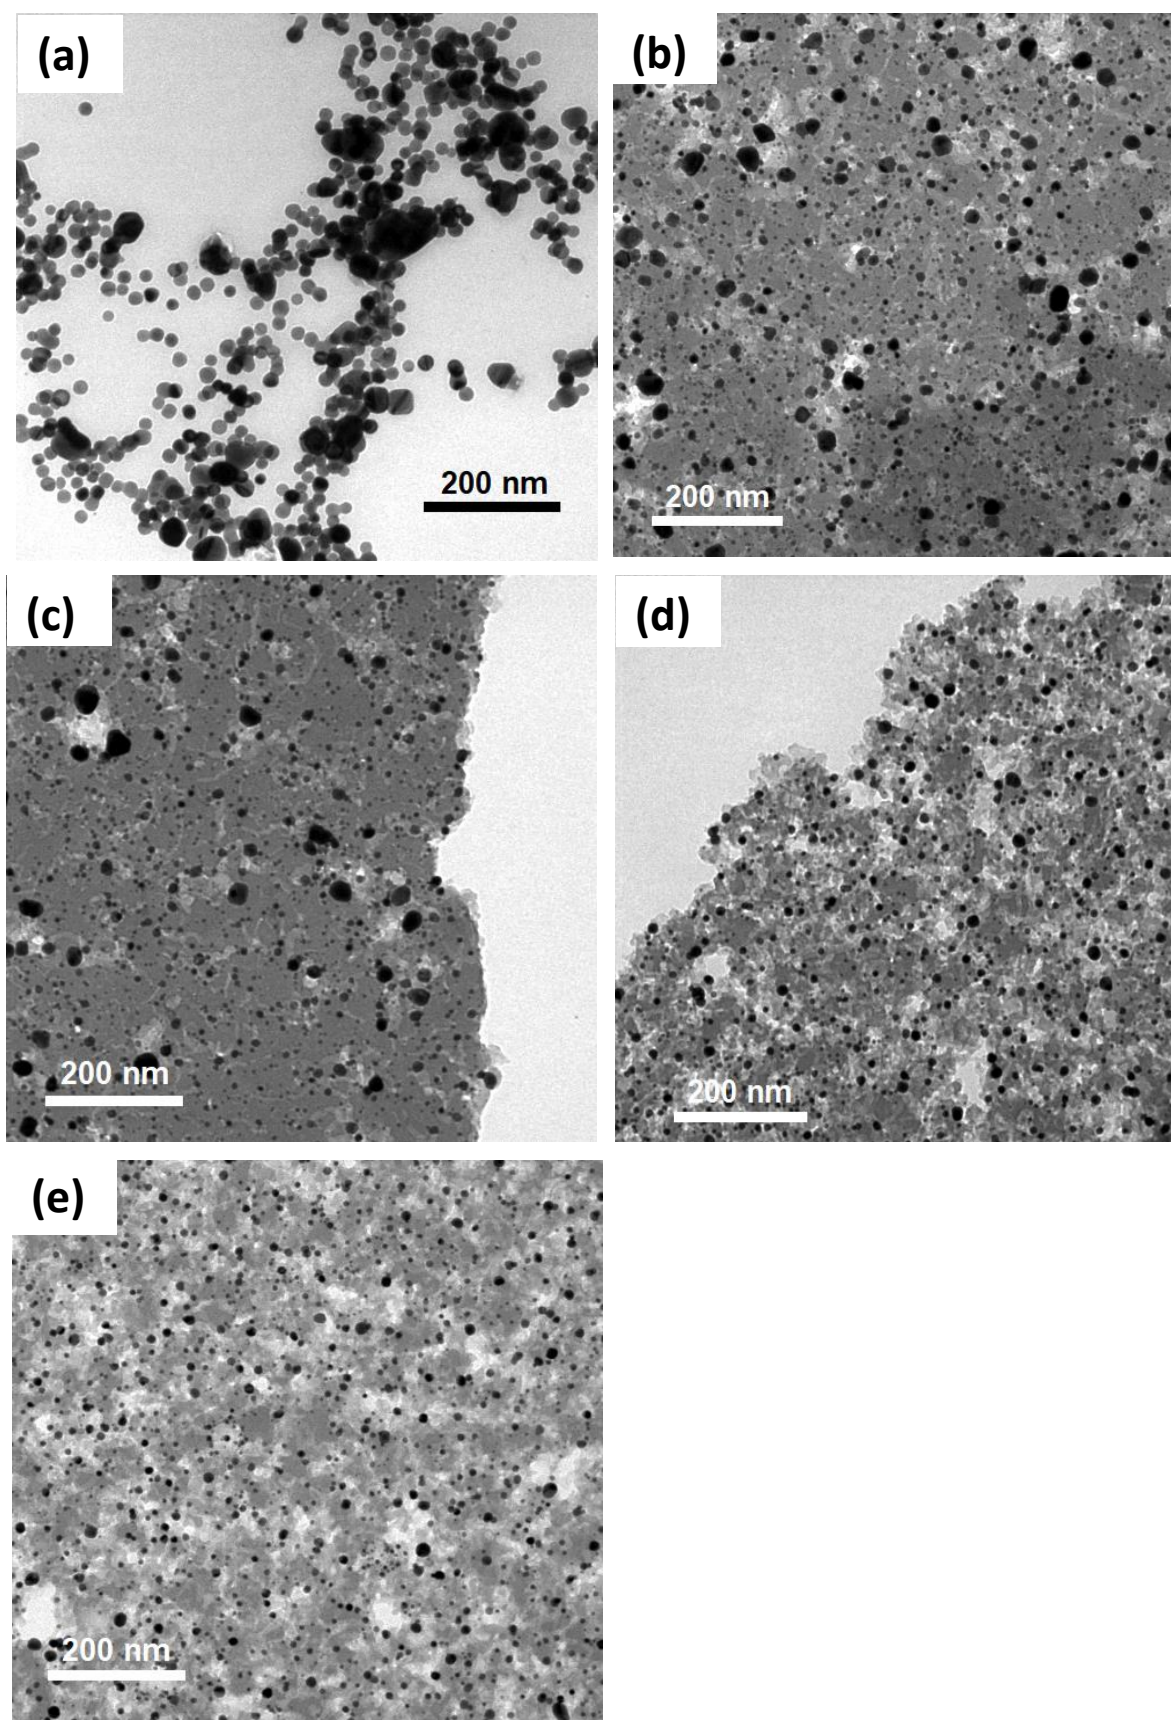

**Fig. S2.** Particle size distribution analysis of Ag/dex tran (a), Au/dextran (e) and Ag-Au bimetallic NPs in dextran (b-d).

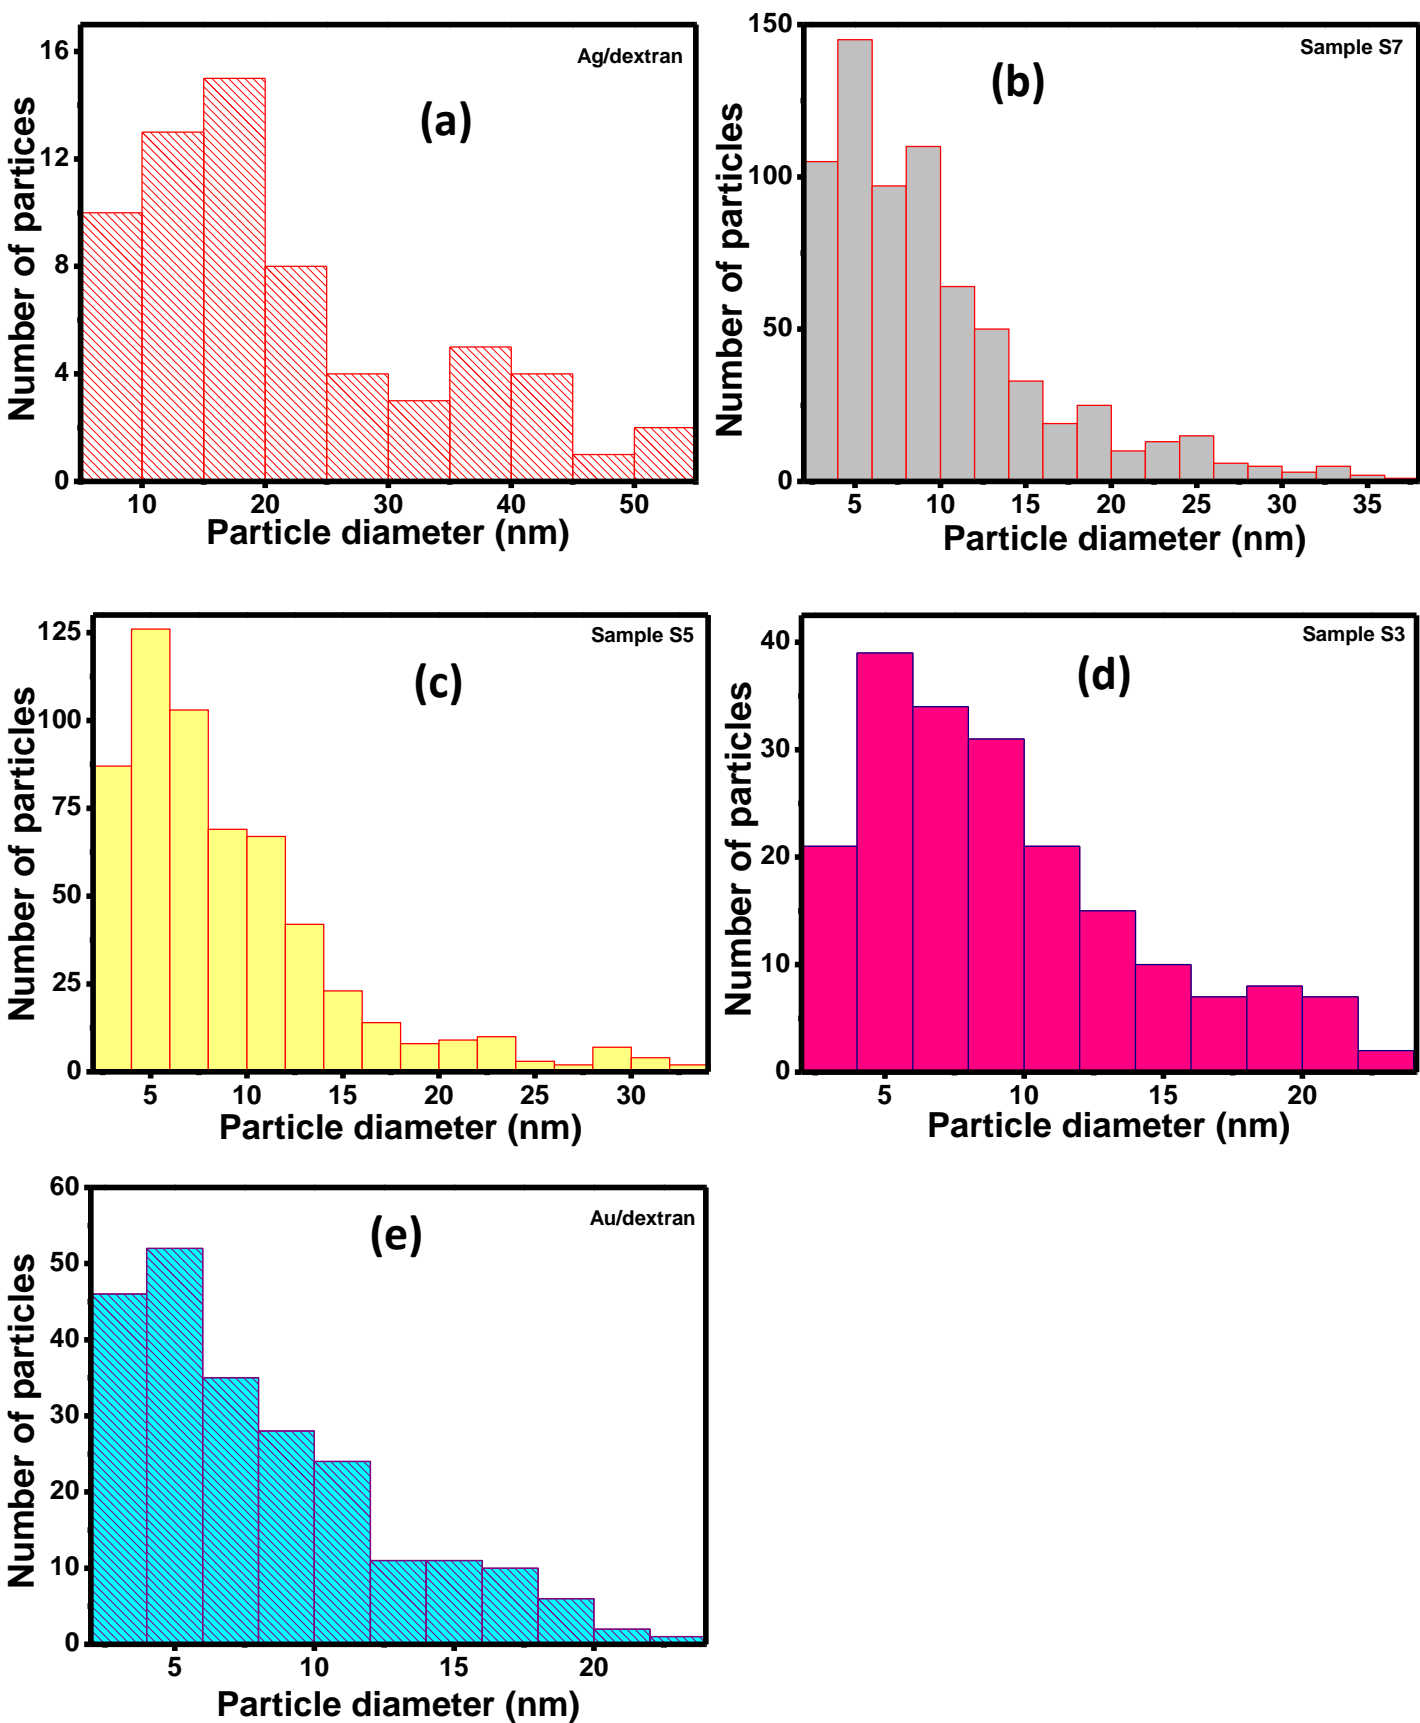

**Table S1.** Elemental composition of sample S7.

| Element | Weight% | Atomic% |
|---------|---------|---------|
| C K     | 53.56   | 75.43   |
| O K     | 19.87   | 20.99   |
| Cl K    | 1.08    | 0.28    |
| Ag L    | 15.14   | 2.36    |
| Au M    | 10.35   | 0.94    |
| Totals  | 100.00  | 100.00  |

**Table S2.** Elemental composition of sample S5.

| Element | Weight% | Atomic% |
|---------|---------|---------|
| C K     | 47.62   | 75.17   |
| O K     | 16.99   | 20.11   |
| Cl K    | 0.56    | 0.30    |
| Ag L    | 13.50   | 2.37    |
| Au M    | 21.33   | 2.05    |
| Totals  | 100.00  | 100.00  |

**Table S3.** Elemental composition of sample S3.

| Element | Weight% | Atomic% |
|---------|---------|---------|
| C K     | 49.14   | 73.01   |
| O K     | 21.45   | 23.89   |
| Ag L    | 5.93    | 0.98    |
| Au M    | 23.58   | 2.12    |
| Totals  | 100.00  | 100.00  |

**Table S4.** The bands of hydroxyl and carbonyl stretching vibration of dextran, Ag/dextran, Au/dextran and Ag-Au bimetallic/dextran.

| Sample     | $\nu(\text{OH})$ band<br>( $\text{cm}^{-1}$ ) | $\nu(\text{C}=\text{O})$ band<br>( $\text{cm}^{-1}$ ) |
|------------|-----------------------------------------------|-------------------------------------------------------|
| Dextran    | 3471                                          | 1658                                                  |
| Ag/dextran | 3444                                          | 1645                                                  |
| Au/dextran | 3363                                          | 1635                                                  |
| S3         | 3392                                          | 1647                                                  |
| S5         | 3444                                          | 1635                                                  |
| S7         | 3442                                          | 1637                                                  |
